# Supplementary material for: Medium-Chain Triglycerides (MCTs) for the Symptomatic Treatment of Dementia-Related Diseases: A Systematic Review
Source: Hindawi journal article supplement (doi:10.1155/2024/9672969), 2024-04-12
Supplement: f1 [file 9672969.f1.pdf]

# Medium-chain triglycerides (MCTs) for the symptomatic treatment of dementia-related diseases: A systematic review

Nike Meer <sup>1</sup> and Tobias Fischer <sup>1,\*</sup>

<sup>1</sup> FH Muenster - University of Applied Sciences, Department of Food, Nutrition, and Facilities, Corrensstraße 25, Muenster 48149, Germany

\* Correspondence: tobias.fischer@fh-muenster.de.

## Supplementary Material

**Supplementary Table S1.** Search strategy including database, search string, and filters.

| Data base      | Search                                                                                                                                                                                                                                                                                                                                                                                                                                                                                                                                                                                               | Filter          |
|----------------|------------------------------------------------------------------------------------------------------------------------------------------------------------------------------------------------------------------------------------------------------------------------------------------------------------------------------------------------------------------------------------------------------------------------------------------------------------------------------------------------------------------------------------------------------------------------------------------------------|-----------------|
| Pubmed         | (medium chain OR medium-chain OR Caproic* OR Capryl* OR Capric* OR Lauric*) AND (fatty acid OR Triglyc* OR triacyl* OR acyl*OR oil) OR Tricaprilin OR Tricaprylin OR Caprylidene OR Axona OR coconut OR Palm oil OR (ketogenic AND (formula OR supplement OR agent OR Drink) OR MCFA OR MCT)<br><b>AND</b><br>(Dementia OR Alzheimer OR Lewy body OR Frontotemporal OR Parkinson OR MCI OR cognitive OR memory) AND (Impair* OR decline OR defect)<br><b>AND</b><br>(Trial OR study OR RCT OR intervention OR case)<br><b>NOT</b><br>(Review[Filter] OR Review[Title] OR mice[title] OR rat[title])  | English, German |
| CENTRAL        | <b>#1</b> (Medium chain OR medium-chain OR Capryl* OR Capric* OR Lauric*) NEXT (Triglyc* OR Triacyl* OR fatty OR acid* OR acyl* OR oil*) OR MCFA OR MCT<br><b>#2</b> Tricaprilin OR Tricaprylin OR Caprylidene OR Axona<br><b>#3</b> Coconut* OR Palm OR Coconut Oil<br><b>#4</b> keto* NEXT (Formula* OR Supplement* OR Agent* OR Drink*)<br><b>#5</b> Dement* OR Alzheimer* OR ((cognit* OR memory) NEXT (Impair* OR decli* OR disorder*)) OR MCI OR Lewy body OR Frontotemporal OR Parkinson<br><b>#6</b> Dementia and cognitive Improvement*.crg<br><b>(#1 OR #2 OR #3 OR #4) AND (#5 OR #6)</b> | Trials          |
| LIVIVO         | TI=(Medium chain OR medium-chain OR Caprylidene OR Tricaprylin OR Tricaprilin OR Axona OR MCT OR MCFA OR coconut OR Palm Oil OR ketogenic Formula OR ketogenic Agent OR Ketogenic Drink OR ketogenic Supplement)<br><b>AND</b><br>TI=(Dement* OR Alzheimer* OR cognitive impair* OR Cognitive disorder* OR Memory Disorder* OR MCI OR Lewy Body OR Frontotemporal OR Parkinson)<br><b>NOT</b><br>TI=(Review OR Meta)                                                                                                                                                                                 | English, German |
| Web of Science | TS=(medium chain OR medium-chain OR Caproic* OR Capryl* OR Capric* OR Lauric*) AND (fatty acid OR Triglyc* OR triacyl* OR acyl) OR Tricaprilin OR Tricaprylin OR Caprylidene)<br><b>AND</b><br>TS=(Dement* OR Alzheimer* OR MCI OR Lewy body OR Frontotemporal OR Parkinson OR (cognit* OR memory) AND (Impair* OR decli* OR disorder*))<br><b>AND</b><br>LA=(English OR German)<br><b>NOT</b><br>TI=(Review OR Meta*)                                                                                                                                                                               | English, German |

**Supplementary Table S2.** Characteristics of included uncontrolled studies; MCT = medium chain triglycerides; m/f = male/female; CO = coconut oil; d = days; w = weeks; OLE = open label extension; Ø = mean; C8 = caprylic acid; C10 = capric acid; AD = Alzheimer's disease.

| Author/year<br>country               | Diagnosis<br>MMSE (Ø) | Age (Ø)<br>m/f (%) | APOE<br>(+/-)    | N<br>(analysis) | Drop-out<br>rate | Intervention product (C8%/C10%)<br>Application form<br>Intake                                                                       | Intervention duration<br>Initial phase     | Dosage      | g MCT/d<br>(g C8/C10)                          |
|--------------------------------------|-----------------------|--------------------|------------------|-----------------|------------------|-------------------------------------------------------------------------------------------------------------------------------------|--------------------------------------------|-------------|------------------------------------------------|
| <b>Case Reports</b>                  |                       |                    |                  |                 |                  |                                                                                                                                     |                                            |             |                                                |
| Newport et al., 2015<br>-            | AD<br>23              | 58<br>100/0        | 100%<br>(100/0)  | 1 (1)           | -                | CO/MCT mixture (4:3)                                                                                                                | 2 years<br>35 mL CO → 165 ml MCT/CO        | 3-4x 165 mL | 132 g<br>(68/31) <sup>3</sup>                  |
| Farah et al., 2014<br>USA            | AD<br>23              | 70<br>100/0        | 100%<br>(0/100)  | 1 (1)           | -                | MCT-powder (C8)                                                                                                                     | 109 d<br>10 → 40 g in 7d                   | 1x 40 g     | 20 g<br>(20/0)                                 |
| Maynard et al., 2013<br>USA          | AD<br>20,3            | 81,3<br>75/25      | 12,5%<br>(100/0) | 8 (8)           | 12,5%            | MCT oil (C8)                                                                                                                        | Ø 14,6 months <sup>2</sup><br>-            | 1x 20 g     | 20<br>(20/0)                                   |
| <b>Cohort studies</b>                |                       |                    |                  |                 |                  |                                                                                                                                     |                                            |             |                                                |
| Maynard et al., 2013<br>USA          | AD<br>20,6            | 79,7<br>56/44      | 12,7%<br>(29/71) | 55 (55)         | 14,5%            | MCT oil (C8)                                                                                                                        | Ø 19,8 months <sup>2</sup>                 | 1x 20 g     | 20 g<br>(20/0)                                 |
| Ohnuma et al., 2016<br>Japan         | AD<br>18,1            | 63,9<br>55/45      | 100%<br>(32/68)  | 24 (22)         | 8,3%             | MCT powder Axona (100/0)<br>As a drink in 118-236 mL <sup>1</sup><br>Postprandial <sup>1</sup>                                      | 90 d<br>10 → 40 g in 6d; every 2d +10<br>g | 1x 40 g     | 20 g<br>(20/0)                                 |
| Gandotra et al., 2014<br>Netherlands | AD<br>10,4            | 81,9<br>32/68      | /                | 32 (31)         | 3,1%             | CO native<br>Pure or mixed in<br>Postprandial for breakfast                                                                         | 4 weeks                                    | 1x 20 mL    | 11,7 g<br>(1,4/1) <sup>3</sup>                 |
| Croteau et al. 2018<br>Canada        | AD<br>22              | 73,5<br>40/60      | /                | 15 (-)          | 26,7%            | 1. MCT supplement Abitec (95/0)<br>2. MCT supplement Abitec (55/35)<br>Emulsified in 250 ml lactose-free milk<br>To the meals (2-3) | 1 month each<br>4 weeks wash out<br>1 week | 2x 15 g     | 14,25 g<br>(14,3/0)<br><br>13,5 g<br>(8,3/5,3) |
| Ota et al. 2019<br>Japan             | AD<br>20              | 73,4<br>55/45      | /                | 19 (-)          | 15,3%            | MCT supplement Ketonformula (21,8/7)<br>As drink in hot water<br>Preprandial                                                        | 12 weeks                                   | 1x 50 g     | 19,4 g<br>(10,9/3,5)                           |

<sup>1</sup> Information from external data from the manufacturer [95]

<sup>2</sup> The minimum number of months of treatment is six months

<sup>3</sup> Estimated value based on 63,% MCT content 7,5% C8/5,7% C10

**Supplementary Table S3.** Characteristics of included controlled studies; MCT = medium chain triglycerides; LCT = long chain triglycerides; m/f = male/female; CO = coconut oil; d = days; w = weeks; OLE = open label extension; Ø = mean; C8 = caprylic acid; C10 = capric acid; AD = Alzheimer`s disease; ITT= intention to treat; PP = per protocol; DC = dosage compliant.

| Author/year<br>country                   | Diagnosis<br>MMSE (Ø) | Age (Ø)<br>m/f (%) | APOE (+/-)       | N (IG/KG)<br>N Analysis (IG/KG)                                  | Drop-out rate<br>(IG/KG) | Intervention product (C8%/C10%)<br>Application form<br>Intake                                                                                                                                                       | Intervention duration<br>Initial phase | Dosage   | Control                                                                                   | g MCT/d<br>(C8/C10)              |
|------------------------------------------|-----------------------|--------------------|------------------|------------------------------------------------------------------|--------------------------|---------------------------------------------------------------------------------------------------------------------------------------------------------------------------------------------------------------------|----------------------------------------|----------|-------------------------------------------------------------------------------------------|----------------------------------|
| <b>Parallel Design</b>                   |                       |                    |                  |                                                                  |                          |                                                                                                                                                                                                                     |                                        |          |                                                                                           |                                  |
| Chan et al. 2017<br>Malaysia             | AD<br>10-24           | 70-79<br>35/65     | /                | 40 (20/20)<br>22 (8/14)                                          | 45%<br>(60/30)           | CO native<br>Pure, mixed in food/drinks                                                                                                                                                                             | 24 weeks<br>2 weeks 2x 15 ml/d         | 2x 30 mL | Placebo<br>Water, coconut<br>essence                                                      | 35,1 g<br>(4,1/3,1) <sup>3</sup> |
| De la Rubia Ortí et al.<br>2019<br>Spain | AD<br>0-26            | 79,8<br>25/52      | /                | 44 (22/22)<br>N/A                                                | N/A                      | CO<br>Pure<br>With meals (morning, midday)<br>Base: Mediterranean diet                                                                                                                                              | 3 weeks                                | 2x 20 mL | Mediterranean diet (15 E% protein, 55 E% complex carbohydrates, 30 E% fat, 20-30 g fiber) | 23,4 g<br>(2,8/2,1) <sup>3</sup> |
| Henderson et al. 2009<br>USA             | AD<br>19,6            | 76,9<br>48/52      | 88,6%<br>(56/44) | 152 (86/66)<br>ITT 144 (77/63)<br>PP 91 (45/46)<br>DC 96 (46/50) | 34%<br>(44/21)           | MCT powder AC-1202 (95/5)<br>(64% acacia gum, 2,6% syloid, 33% MCT)<br>As drink in 230 mL liquids (milk, juice, 12 weeks water); Protocol change: Mixed with Abbott 1 week<br>Ensure meal replacement<br>With meals | 12 weeks                               | 2x 30 g  | Placebo<br>(10% safflower oil, 51% acacia gum, 37% dextrose, 2% syloid); isocaloric       | 19,8 g<br>(18,8/1)               |
| Henderson et al. 2020<br>USA             | AD<br>20,7            | 76,6<br>41/59      | 100%<br>(31/69)  | 413 (208/205)<br>275 (137/138)                                   | 19,6%<br>(23/16)         | MCT supplement AC-1204 (100/0)<br>As drink in 120 mL water <sup>1</sup>                                                                                                                                             | 6 months<br>2 weeks, every 4 d +10 g   | 1x 40 g  | Placebo<br>Sunflower oil, maltodextrin                                                    | 20 g<br>(20/0)                   |
| Rebello et al. 2015<br>USA               | MCI<br>25-28          | 58-78<br>50/50     | 100%<br>(50/50)  | 6 (3/3)<br>4 (2/2)                                               | 33%<br>(33/33)           | MCT oil Nestle<br>In Yoplait 99% low-fat yogurt                                                                                                                                                                     | 24 weeks                               | 1x 56 g  | Placebo<br>Safflower oil                                                                  | 56 g<br>(39/16,8) <sup>3</sup>   |
| Torosyan et al. 2018<br>USA              | AD<br>21,1            | 79,9<br>20/70      | 87,5%<br>(57/43) | 16 (14/2)<br>16 (14/2)                                           | /                        | MCT powder Caprylidene (100/0)<br>As drink in 118-236 mL liquids <sup>2</sup><br>Postprandial (morning, midday)                                                                                                     | 45 days                                | 1x 40 g  | Placebo<br>/                                                                              | 20 g<br>(20/0)                   |
| <b>BENEFIC Trial</b>                     |                       |                    |                  |                                                                  |                          |                                                                                                                                                                                                                     |                                        |          |                                                                                           |                                  |
| Fortier et al. 2019<br>Canada            | MCI<br>27,4           | 74,6<br>35/65      | 95% (38/62)      | 52 (27/25)<br>39 (19/20)                                         | 25%<br>(30/20)           | MCT supplement Captex 355 (60/40)<br>As drink emulsified in 250 mL lactose-free skim milk<br>With meals (morning, evening)                                                                                          | 6 months<br>2 weeks 50 → 250 mL        | 2x 15 g  | Placebo<br>Sunflower oil                                                                  | 30 g<br>(18/12)                  |
| Fortier et al. 2021<br>Canada            | MCI<br>/              | 72,2<br>26/74      | 96% (24/76)      | 122 (63/58)<br>82 (39/43)                                        | 32,8%<br>(38/26)         |                                                                                                                                                                                                                     |                                        |          |                                                                                           |                                  |
| Roy et al. 2021<br>Canada                | MCI<br>27,2           | 74,6<br>46/54      | 97% (38/62)      | 33 (17/16)                                                       | /                        |                                                                                                                                                                                                                     |                                        |          |                                                                                           |                                  |
| Roy et al. 2022<br>Canada                | MCI<br>27,2           | 75,1<br>44/66      | 97% (35/65)      | 32 (17/15)                                                       | /                        |                                                                                                                                                                                                                     |                                        |          |                                                                                           |                                  |

| Cross-Over Design               |               |               |             |               |      |                                                                                                |                                                          |          |                                   |                      |   |  |  |
|---------------------------------|---------------|---------------|-------------|---------------|------|------------------------------------------------------------------------------------------------|----------------------------------------------------------|----------|-----------------------------------|----------------------|---|--|--|
| Ota et al. 2019<br>Japan<br>RCT | AD<br>20      | 73,4<br>55/45 | /           | 20 (20)<br>/  | -    | MCT supplement <i>Ketonformula</i> (21,8/7)<br>As drink in hot water<br>Preprandial            | Single dose on two<br>separate days of visit             | 1x 50 g  | Placebo<br>isocaloric LCT-formula | 19,4 g<br>(10,9/3,5) |   |  |  |
| Juby et al. 2022<br>Canada      | AD<br>22,6    | 72,6<br>55/45 | 95% (53/47) | 20 (219)<br>/ | 5%   | MCT oil <i>Bulletproof Brain Octane</i> (>99,3/0,6)                                            | 3 months each<br>1 month wash-out<br>4 weeks 15 -> 45 ml | 3x 15 mL | Placebo<br>Olive oil              | 42,8<br>(42/0,3)     | g |  |  |
| Reger et al. 2012<br>USA        | AD, MCI<br>22 | 74,7<br>/     | /           | 20 (20)<br>/  | -    | MCToil <i>Neobee 895</i> (95/5)<br>As drink emulsified in 152 mL cream<br>Preprandial          | Single dose on two<br>separate days of visit             | 1x 40 mL | Placebo<br>Cream                  | 38<br>(36,1/1,9)     | g |  |  |
| Xu et al 2018<br>USA            | AD<br>19,2    | 75,1<br>37/63 | 100% (6/94) | 53 (46)<br>/  | 7,5% | MCT Jelly (75/25)<br>Pure<br>Preprandial 30 minutes before meals<br>(morning, midday, evening) | 30 days each<br>30 days wash-out                         | 3x 6 g   | Placebo<br>Safflower oil jelly    | 17,3 (13/4,3)        |   |  |  |

<sup>1</sup>From trial protocol NCT02833012  
<sup>2</sup>Information from external data from the manufacturer [49]  
<sup>3</sup>Estimated value based on 63,5% MCT content and MCFA distribution of 7,5% C8/5,7% C10
